1 **Making use of an App (Tawakkalna) to track and reduce COVID transmission in KSA**

2 Donal Bisanzio,<sup>1,2</sup> Richard Reithinger,<sup>1</sup> Sami Almudarra<sup>3</sup>, Reem F. Alsukait<sup>4,5</sup>, Di Dong,<sup>5</sup> Yi Zhang,<sup>5</sup>

3 Sameh El-Saharty<sup>5</sup>, Hala Almossawi,<sup>1</sup> Christopher H. Herbst<sup>5</sup>, and Ada Alqunaibet<sup>6</sup>

4

5 <sup>1</sup> RTI International, Washington, D.C., USA.

6 <sup>2</sup> Epidemiology and Public Health Division, School of Medicine, University of Nottingham,

7 Nottingham, UK.

8 <sup>3</sup> Saudi Ministry of Health, Riyadh, Saudi Arabia

9 <sup>4</sup> Department of Community Health Sciences, College of Applied Medical Sciences, King Saud

10 University, Riyadh, Saudi Arabia

11 <sup>5</sup> World Bank, Washington, D.C., USA.

12 <sup>7</sup> Saudi Public Health Authority, Riyadh, Saudi Arabia

13 **Corresponding author:** Donal Bisanzio, [dbisanzio@rti.org](mailto:dbisanzio@rti.org)

## 14 **Abstract**

15 Since March 2020, the Kingdom of Saudi Arabia (KSA) has launched several digital applications to  
16 support the intervention response to reduce the spread of SARS-CoV-2. At the beginning of 2021, the  
17 KSA Government introduced a mandatory immunity passport to regulate access to public venues. The  
18 passport was part of the strategy of resuming public activities before reaching high vaccination  
19 coverage. The passport was implemented as a new service in the Tawakkalna mobile phone  
20 application (App). The immunity passport allowed access to public locations only for the users who  
21 recovered from COVID-19 or those who were double vaccinated. Our study aimed to evaluate the  
22 effectiveness of the immunity passport, implemented through the Tawakkalna App, on SARS-CoV-2  
23 spread. We built a spatial-explicit individual-based model to represent the whole KSA population  
24 (IBM-KSA) and its dynamic on a national scale. The IBM-KSA was parameterized using country  
25 demographic, remote sensing, and epidemiological data. The model included non-pharmaceutical  
26 interventions and vaccination coverage. A social network was created to represent contact  
27 heterogeneity and interaction among age groups of the population. The IBM-KSA also simulated the  
28 movement of people across the country based on a gravity model. We used the IBM-KSA to evaluate  
29 the effect of the immunity passport on the COVID-19 epidemic's outcomes. The IBM-KSA results  
30 showed that implementing the immunity passport through the Tawakkalna App mitigated the SARS-  
31 CoV2 spread. In a scenario without the immunity passport, the KSA could have reported 1,515,468  
32 (95% confidence interval [CI]: 965,725-1,986,966) cases, and 30,309 (95% CI: 19,314-39,739) deaths  
33 from March 2021 to November 2021. The comparison of IBM-KSA results with COVID-19 official  
34 reporting estimated that the passport effectively reduced the number of cases, hospitalizations, and  
35 deaths by 8.7 times, 13.5 times, and 11.9 times, respectively. These results showed that the  
36 introduction of the immunity passport through the Tawakkalna App was able to control the spread of  
37 the SARS-COV-2 until vaccination reached high coverage. By introducing the immunity passport, The  
38 KSA was able to allow to resume most of public activities safely.

39

## 40 **Background**

41 The response to the COVID-19 pandemic has been characterized by the use of several information,  
42 communication, and technology applications (ICT apps). Leveraging the widespread population  
43 coverage of smart phones and access to the internet, the pandemic has stimulated the development and  
44 launch of many digital e-health applications to support governments by mitigating COVID-19  
45 outcomes [1]. In March 2020, Singapore; the Republic of Korea (Korea); Hong Kong SAR, China;  
46 and Japan deployed contact tracing ICT apps to support the contact tracing of SARS-CoV-2 cases [2].  
47 Following the success of reducing the spread of the disease in countries where the contact tracing apps  
48 were employed, many other countries decided to deploy these apps to support interventions aiming to  
49 reduce the SARS-CoV-2 spread. These new e-health solutions used innovative technologies based on  
50 Bluetooth, Global Positioning System (GPS), artificial intelligence, and machine learning [3].

51 The aim of these ICT solutions was to improve health care system delivery and reduce virus  
52 circulation. Apps were created to provide information about COVID-19 both nationally and  
53 internationally, help to track virus exposure and confirmed cases, improve access to health services  
54 using remote-health solutions, regulate movement during lockdown and curfew periods, support  
55 vaccination campaigns, and regulate international travel and access to public spaces [3]. Most of the  
56 launched ICT apps were able to perform contact tracing, carry out self-assessments, book testing  
57 appointments, report on testing results, and allow for remote access to health services [4].

58 When COVID-19 vaccinations become available early 2021, countries decided to develop and launch  
59 ICT solutions to support the rollout of available vaccines that included an *immunity passport* (also  
60 called a *risk-free certificate*) feature. Apps—often linked to a country’s ministry of health or health  
61 providers’ data platforms—were created to book vaccination appointments and record the  
62 immunization status of people. Many countries adopted immunity passport systems to identify  
63 vaccinated people, allowing them to move more freely, both nationally and internationally, than non-  
64 vaccinated individuals [5]; adoption of these immunity passport apps was also used to increase  
65 vaccination coverage among the population. The immunity passport is not a new concept: this  
66 approach has been used for decades to reduce the risk of yellow fever infection in many countries with  
67 high transmission risk [6]. However, the effectiveness of these solutions has not been fully assessed,

68 given the difficulty of untangling the role of each digital application on SARS-CoV-2 circulation and  
69 COVID-19 outcomes.

70 After the first case of COVID-19 was recorded in Saudi Arabia on March 3, 2020, the government  
71 rapidly adopted NPIs to mitigate the spread of the virus among its population. The rolled out NPIs  
72 included closing national borders, lockdowns, curfews, school closings, and enforcing mask-wearing  
73 and physical distancing in public spaces. By imposing strict NPIs, KSA recorded fewer than  
74 approximately 500 daily reported cases from September 2020 to the end of March 2021 [7]. Indeed, a  
75 recent study estimated that between June 2020 and June 2021, the adoption of these NPIs averted  
76 roughly 4 million cases, 600,000 hospitalizations, and 70,000 deaths due to COVID-19 [8].

77 Like other countries, KSA has implemented multiple ICT solutions to support the national health  
78 system in the response to COVID-19—a step that also built on and was aligned with KSA's health  
79 system modernization set forth in the country's Vision 2030 National Transformation Program [9]. The  
80 aim of the program was to increase access to health care by improving remote services (screening,  
81 prescription, scheduling visit appointments) for the population [9]. KSA was not new to using ICTs to  
82 handle emerging infection diseases. The country had already adopted ICT for handling the spread of  
83 Middle East respiratory syndrome coronavirus virus (MERS-CoV) in 2015 [10-11]. Increasing the e-  
84 health capacity of the health system resulted in an improved access to services with a high cost-benefit  
85 for the KSA health system [12]. Furthermore, as of January 2020, approximately 89 percent of the  
86 KSA population had access to the internet and 96 percent of the adult population owned smart phones  
87 [13]. Given the country's experience with ICT to respond to health emergencies, its new public health  
88 strategy—based on remote solutions and the high penetration of information technology—helped KSA  
89 to rapidly deploy e-health solutions by adding new features to already-launched apps and developing  
90 new ones. Although many applications were launched from government and private sector [14], the  
91 pillars of the KSA e-health response to COVID-19 were five mobile phone applications: Mawid,  
92 Tabaud, Sehha, Tetamman, and Tawakkalna (Tables S1 and Table S2). Among all these applications,  
93 only the use of the Tawakkalna App was made mandatory for the KSA population.

94 The Tawakkalna app was launched in the KSA in April 2020. This app was designed to regulate  
95 people's movements during lockdowns and curfews. The app records the health status of users and  
96 allows them to request movement permits during curfews and lockdowns. A color system also shows  
97 whether the user is able to travel freely in the country: green means that the user can travel; yellow  
98 means that the person has been exposed, could become positive, and needs to quarantine; and red  
99 means that the person is infected and has to remain in self-isolation. The number of app users rapidly  
100 increased during the month following its release, reaching about 20 million users by March 2021. The  
101 functions of Tawakkalna app were updated when vaccination was rolled out in December 2020 [15].  
102 In January 2021, the MOH launched the Immunity Passport service as a new functionality of the app  
103 [16], which recorded the user's COVID-19 vaccine doses received, the vaccine brand they received,  
104 and the date of vaccination. People who received two COVID-19 vaccine doses were then provided  
105 with access to public spaces and events. Furthermore, the app allowed KSA to fully resume national  
106 travel, reopen public venues, and resume public events starting in March 2021; it also allows for the  
107 resumption of in-person teaching for children above 11 years of age in August 2021 [17].

108 The use of the Tawakkalna app as an immunity passport, in conjunction with mandatory enforcement  
109 of NPIs, has been the country's main strategy for re-opening shops, restaurants, and other public  
110 venues, and for allowing public events. The use of the app also aimed to mitigate the spread of the  
111 virus while, at the same time, reopening public activities before the country reached a high vaccination  
112 coverage rate. Furthermore, the app was the only ICT made mandatory for the KSA population.

113 Estimating the impact of using the Tawakkalna app as an immunity passport is crucial to better  
114 understanding the role of implementing such a policy to minimize future outbreaks of COVID-19 or  
115 other highly transmissible infections. The aim of this study was to use a novel epidemiological  
116 individual based modeling framework (IBM-KSA) representing KSA's population to assess the effect  
117 of Tawakkalna app as an immunity passport, using the estimated number of cases, hospitalizations,  
118 and deaths from March 2021 to November 2021 as its metric. The epidemiological model had already  
119 been used to estimate the health benefit of NPIs adopted by KSA before the introduction of the  
120 vaccines [8].

121

## 122 **Method**

### 123 *IBM-KSA model structure description*

124 The impact of using the Tawakkalna app as a COVID-19 immunity passport for tracking SARS-CoV-  
125 2 circulation in the Kingdom of Saudi Arabia (KSA) was modeled by simulating interaction at the  
126 person level using an individual-based model. The individual-based model used to represent the KSA  
127 population was named IBM-KSA. The model had already been used to estimate the effect of non-  
128 pharmaceutical interventions (NPIs) adopted during the first phase of the pandemic, between March 2,  
129 2020, and July 31, 2021 [8]. The IBM-KSA model utilizes a contact network structure to simulate  
130 interactions among the entire KSA population—that is, among approximately 34 million people. The  
131 network structure was preferred to an agent model because it allows for contact heterogeneity among  
132 people while reducing computational load. The model was built using demographic data to reproduce  
133 a population with characteristics of the actual KSA population. The IBM-KSA also accounts for  
134 differences in contact interactions among age groups [18-21] as well as accounts for movement flux  
135 among cities—a main driver of SARS-CoV-2 spread in a country [22].

### 136 *COVID-19 Measures between March and November 2021*

137 The model included NPIs and the vaccination campaign, as their implementation dates as of  
138 November 2021. The model also included the introduction of the immunity passport through the  
139 Tawakkalna app to calibrate the model with real data. After calibration, the IBM-KSA simulated  
140 projections of COVID-19 cases, hospitalizations, and deaths, with or without the introduction of the  
141 immunity passport. The modeled scenarios simulated the epidemic from March 1, 2021, to November  
142 30, 2021. This time window was chosen to capture the effect of the use of Tawakkalna app immunity  
143 passport before the introduction of the SARS-CoV-2 Omicron variant in the country.

### 144 *Epidemiological Model*

145 The transmission dynamic of COVID-19 was represented in the model by the classical transition status  
146 seen in SEIR compartmental models:

147 Susceptible (S) → Exposed (E) → Infectious (I) → Recovered/Dead (R).

148 COVID-19 national data were used to estimate the hospitalization and fatality rates for KSA [7] to  
149 determine the number of infected individuals who would also be at risk of being hospitalized or dying.

150 The transition from one status to another is a function of pathogen characteristics (for example,  
151 virulence, incubation period, infectious period, hospitalization, and fatality rate); interaction among  
152 individuals (only for S through I); and immunization status [22-27]. The IBM-KSA model also  
153 accounts for the fraction of asymptomatic cases, set as equal to 80 percent [27]. A detailed description  
154 of the IBM-KSA model framework and transmission parameters can be found in Bisanzio et al. [13].  
155 Here follows a list of new and updated parameters used to modify the KSA-IBM published in Bisanzio  
156 et al. [13].

157 Transmission parameters:

- 158     ▪ Transmission probability per hour: 0.06 and 0.12 for Alpha and Delta variants, respectively [8,  
159       28]
- 160     ▪ First case of Delta variant reported in August 2021 [29]
- 161     ▪ Naturally acquired immunity: >12months (assumption) but with reduced protection over time  
162       [30]
- 163     ▪ Hospitalization rate equal to 10 percent and death rate equal to 2 percent of infected  
164       individuals [7]

165 NPIs included in the IBM-KSA:

- 166     ▪ Mask wearing for 70 percent of the population and social distancing for 80 percent of the  
167       population
- 168     ▪ Full isolation for 80 percent of the population [8]

- 169       ▪ Resumed in-person education only for students 11 years of age with the following restrictions:
- 170               ▪ Mask wearing and social distancing set to 90 percent
- 171               ▪ Class isolation in case of detected cases among students
- 172               ▪ Children can attend class only if double-vaccinated

173 Vaccination status of KSA population:

- 174       ▪ 70 percent of the population was fully vaccinated by November 2021
- 175       ▪ 90 percent of 11–17 age group was fully vaccinated by November 2021

176 Vaccination campaign:

- 177       ▪ ~350,000 vaccinations per day [31]
- 178       ▪ 3-week lag between the two doses
- 179       ▪ Vaccination offered to people > 17 years old
- 180       ▪ Vaccination for people 11–17 years of age began June 2021
- 181       ▪ Maximum coverage of the population set to 95 percent
- 182       ▪ Delay of second dose for different age groups from April to July 2021

## 183 **Results**

184 The KSA-IBM results showed that using the Tawakkalna app as an immunity passport was able to  
185 substantially mitigate the spread of COVID-19 in the country. If the immunity passport had not been  
186 in place, the number of cases would have drastically increased after the easing of NPIs at the  
187 beginning of March 2021. Additionally, the number of cases would have peaked in June 2021, with  
188 more than 600,000 (95% CI: ~400,000–~900,000) cases per week (Figure 1). The estimated number of  
189 cases fell after June as a result of the expanded rollout of vaccination that also targeted children ages  
190 11–17. The number of reported cases showed a slight increase until February 2021, but then it  
191 remained stable, with roughly 8,400 cases per week from the beginning of May 2021 to the end of



192 August 2021 (Figure 1). The massive reduction of cases after August could be linked to the high  
193 proportion of population having received their second vaccine. The number of cases stabilized until  
194 the end of November 2021, with approximately 300 cases per week (Figure 1).

195 The results of the model showed that the app was able to reduce the spread of the virus while  
196 vaccination coverage was increasing, reaching a threshold after which the spread of the virus was  
197 reduced. Using the IBM-KSA model, we estimate that the use of the app was able to avert 1,343,099  
198 cases, 112,322 hospitalizations, and 27,967 deaths from March to November 2021 (Table 1). The  
199 comparison of IBM-KSA results with COVID-19 official reporting estimated that the passport  
200 effectively reduced the number of cases, hospitalizations, and deaths by 8.7 times, 13.5 times, and 11.9  
201 times, respectively (Table1). After August 2021, when most of the population was fully vaccinated  
202 against SARS-CoV-2, the app's effectiveness was reduced because an important fraction of the  
203 population was—due to their vaccination status—no longer affected by the limitations imposed by the  
204 app (Tables 1 and 2). We estimated that dropping the use of Tawakkalna after reaching high fraction  
205 of fully vaccinated people in the population could have increase the number of cases, hospitalizations,  
206 and deaths by by 1.8 times, 1.7 times, and 1.3 times, respectively (Table2).

## 207 **Discussion**

208 The IBM-KSA model's results showed that introducing the Tawakkalna app immunity passport was  
209 able to reduce the circulation of SARS-CoV-2, resulting in a low number of reported cases,  
210 hospitalizations, and deaths. Re-opening without the passport would have resulted in over a million  
211 more reported cases, over 100,000 more hospitalizations, and around 30,000 more deaths from March  
212 2021 to November 2021 than with the passport. Furthermore, the introduction of the immunity  
213 passport allowed the country to maintain lower circulation of the virus while vaccination coverage was  
214 increasing. These findings are consistent with studies performed in other countries introducing a  
215 national immunity passport. The introduction of the immunity passport (called the *green pass*) in Italy  
216 was linked to a reduction of reported COVID-19 cases, hospitalizations, and deaths, and reduced the  
217 virus's transmission in the early stage of the vaccination campaign [32].

218 Making the app mandatory probably improved the impact of the app on COVID-19 transmission.

219 Studies evaluating ICT solutions that allow for contact tracing have found that when use is non-

220 mandatory, their effect on disease transmission is limited. First studies investigating contact tracing

221 apps have shown that such apps successfully reduced the incidence of COVID-19 in England,

222 Switzerland, and Hong Kong SAR, China [33-35], with the apps' success linked to the percentage of

223 the population using them. In contrast, in Australia, a study showed that a contact tracing system

224 through an app had a small and lower-than-expected effect on COVID-19 incidence [36], which was

225 likely the result of the low number of app users (only approximately 22 percent of the population)

226 [36]. These results are consistent with a recent systematic review showing only weak evidence of the

227 impact of contact tracing on COVID-19 cases [37]. A systematic review highlighted the way modeling

228 studies had estimated high effectiveness of contact tracing apps only with a high level of population

229 uptake (higher than 50 percent) [38]. The non-mandatory policy of contact tracing apps could be at the

230 base of low population uptake in many countries, resulting in a dimmed efficacy of this tool.

231 The use of an immunity passport that reduces the movement of the non-immunized fraction of the

232 population could also result in a rapid increase of vaccination coverage. Enforcing the need to prove

233 their immunization status to access workplaces, shops, schools, public venues, and events would make

234 people keener to be vaccinated. A recent study showed that introducing an immunity passport could

235 speed up the vaccination campaign and provide high vaccination coverage in less time than countries

236 without a mandatory passport [39]. Thus, the adoption of an immunity passport could benefit

237 vaccination campaigns by minimizing the circulation of the virus during the period when vaccination

238 coverage is still increasing, and boost vaccination adherence.

239 Although the introduction of an immunity passport has been criticized for its ethical implications [40],

240 as of October 2021, 144 countries have implemented different forms of immunity passports reporting

241 people's immunization status to regulate access to public space and people movement or to

242 international travel [5]. Depending upon country regulations, the passport could show vaccination

243 status, proof of a negative COVID-19 test, proof of recovery from the virus, or a combination of such

244 information.

245 Because updating digital immunity passport apps through mobile phones is so easy, immunity  
246 passports have also been used to reduce the spread of the new SARS-CoV-2 Omicron variant, first  
247 reported in South Africa in November 2021 [41]. After Omicron was detected in KSA, the number of  
248 reported COVID-19 cases rapidly increased and the country re-established mandatory mask-wearing  
249 and social distancing. The country's Ministry of Health (MOH) also decided to update the rules to  
250 allow access to public spaces only for those people who have received a third dose of the vaccine (the  
251 booster dose) [42]. These rules were able to swiftly decrease the number of cases, avoiding major  
252 disruption to the health system and mitigating the outcome of Omicron spread [7].

253 In conclusion, the study showed that introducing an immunity passport through the Tawakkalna app  
254 could result in high public health benefits by reducing the burden of COVID-19. Such immunity  
255 passports are a tool that can easily be modified to face new public health emergency threats—such as  
256 the emergence of new SARS-CoV-2 variants or future pandemics—and to implement changes in the  
257 public health response. Adopting a digital immunity passport, such as the Tawakkalna app, can reduce  
258 the need for curfews and lockdowns; the result is a positive health impact that also protects the  
259 country's economy by allowing people to safely resume economic activity and international traveling  
260 and protecting human capital.

261

## 262 **Aknowledges**

263 The study was developed by the Saudi Public Health Authority, with technical support from  
264 individuals from RTI International, and the World Bank. The authors are grateful for the support  
265 provided by Rekha Menon (Practice Manager, Health Nutrition and Population, Middle East and  
266 North Africa region, World Bank) and Issam Abousleiman (Country Director, GCC countries, World  
267 Bank). The findings, interpretations, and conclusions expressed in this work are those of the authors  
268 and do not necessarily reflect the views of the authors' employers or organizations that funded the  
269 work.

270

271 **Funding**

272 Financing was provided by the Saudi Public Health Authority and the Saudi Ministry of Finance under  
273 the Health, Nutrition and Population Reimbursable Advisory Services Program (P172148) between the  
274 World Bank and the Saudi Public Health Authority.

275

276 **References**

- 277 1. Bokolo, A. Jnr. 2021. "Implications of Telehealth and Digital Care Solutions during COVID-  
278 19 Pandemic: A Qualitative Literature Review." *Informatics for Health and Social Care* 46  
279 (1): 68–83.
- 280 2. Utzerath, J., R. Bird, G. Cheng, and J. Ohara. 2020. "Contact Tracing Apps in China, Hong  
281 Kong, Singapore, Japan, and South Korea." Freshfields Bruckhaus Deringer Blog Post, April  
282 24, 2020.
- 283 3. Alanzi, T. 2021. "A Review of Mobile Applications Available in the App and Google Play  
284 Stores Used during the COVID-19 Outbreak." *Journal of Multidisciplinary Healthcare* 14: 45.
- 285 4. Golinelli, D., E. Boetto, G. Carullo, A. G. Nuzzolese, M. P. Landini, and M. P. Fantini. 2020.  
286 "Adoption of Digital Technologies in Health Care during the COVID-19 Pandemic:  
287 Systematic Review of Early Scientific Literature." *Journal of Medical Internet Research* 22  
288 (11): e22280.
- 289 5. Ada Lovelace Institute. 2021. International Monitor: Vaccine Passports and COVID Status  
290 Apps. Page current as of October 15, 2021.  
291 [https://www.adalovelaceinstitute.org/project/international-monitor-vaccine-passports-covid-  
292 status-apps/](https://www.adalovelaceinstitute.org/project/international-monitor-vaccine-passports-covid-status-apps/), accessed March 13, 2022.
- 293 6. UK NHS (United Kingdom National Health Service). 2020. Vaccination: Yellow Fever. Page  
294 last reviewed May 22, 2020. <https://www.nhs.uk/conditions/yellow-fever/vaccination/>.

- 295 7. MOH (Ministry of Health). 2020. COVID 19 Dashboard: Saudi Arabia (created 2020).  
296 <https://covid19.moh.gov.sa/>, accessed March 13, 2022.
- 297 8. Bisanzio, D., R. Reithinger, A. Alqunaibet, S. Almudarra, R. F. Alsukait, D. Dong, Y. Zhang,  
298 S. El-Saharty, and C. H. Herbst. 2022. “Estimating the Effect of Non-Pharmaceutical  
299 Interventions to Mitigate COVID-19 Spread in Saudi Arabia.” *BMC Medicine* 20 (1): 1–4.
- 300 9. MOH (Ministry of Health). 2019. *Health Sector Transformation Strategy V.3*. Riyadh: MOH.  
301 <https://www.moh.gov.sa/en/Ministry/vro/Documents/Healthcare-Transformation-Strategy.pdf>,  
302 accessed March 13, 2022.
- 303 10. Saeed, A. A., G. R. Abedi, A. G. Alzahrani, I. Salameh, F. Abdirizak, R. Alhakeem, H.  
304 Algarni, O. A. El Nil, M. Mohammed, A. M. Assiri, and H. M. Alabdely, J. T. Watson, and S.  
305 I. Gerber. 2017. “Surveillance and Testing for Middle East Respiratory Syndrome  
306 Coronavirus, Saudi Arabia, April 2015–February 2016.” *Emerging Infectious Diseases* 23 (4):  
307 682.
- 308 11. Sandhu, R., S. K. Sood, and G. Kaur. 2016. “An Intelligent System for Predicting and  
309 Preventing MERS-CoV Infection Outbreak.” *The Journal of Supercomputing* 72 (8): 3033–56.
- 310 12. Otaibi, M. 2019. “Internet of Things (IoT) Saudi Arabia Healthcare Systems: State-of-the-Art,  
311 Future Opportunities and Open Challenges.” *Journal of Health Informatics in Developing  
312 Countries* 13 (1).
- 313 13. Hootsuite. 2020. Digital 2020: Saudi Arabia. DataReportal.  
314 <https://datareportal.com/reports/digital-2020-saudi-arabia>, accessed March 13, 2022.
- 315 14. Khan, A., A. Alahmari, Y. Almuzaini, N. Alturki, A. Aburas, F. A. Alamri, M. Albagami, M.  
316 Alzaid, T. Alharbi, R. Alomar, and M. A. Tayli. 2021. “The Role of Digital Technology in  
317 Responding to COVID-19 Pandemic: Saudi Arabia’s Experience.” *Risk Management and  
318 Healthcare Policy* 14: 3923.

- 319 15. Assiri, A., J. A. Al-Tawfiq, M. Alkhalifa, H. Al Duhailan, S. Al Qahtani, R. A. Dawas, A. A.  
320 El Seoudi, N. Alomran, O. A. Omar, N. Alotaibi, and S. S. Almudarra, K. Alabdulkarim, S.  
321 Alqahtani, and H. Jokhdar. 2021. "Launching COVID-19 Vaccination in Saudi Arabia:  
322 Lessons Learned, and the Way Forward." *Travel Medicine and Infectious Disease* 43: 102119.
- 323 16. MOH (Ministry of Health). 2021. "MOH and SDAIA Release 'COVID-19 Immunity  
324 Passport' Through 'Tawakkalna' Application." *MOH News*, January 7, 2021.  
325 <https://www.moh.gov.sa/en/Ministry/MediaCenter/News/Pages/News-2021-01-07-004.aspx>,  
326 accessed March 13, 2022.
- 327 17. The New York Times. 2021. "With the Virus Relatively Contained, Saudi Arabia Lifts Most  
328 Pandemic Restrictions." *New York Times*, March 7, 2021.  
329 <https://www.nytimes.com/2021/03/07/world/saudi-arabia-covid.html>, accessed March 13,  
330 2022.
- 331 18. OECD (Organisation for Economic Co-operation and Development). 2021. *Education at a  
332 Glance 2021: OECD Indicators*. Paris: OECD Publishing.  
333 <https://www.oecd.org/education/education-at-a-glance/>, accessed November 27, 2020.
- 334 19. Prem, K., A. R. Cook, and M. Jit. 2017. "Projecting Social Contact Matrices in 152 Countries  
335 Using Contact Surveys and Demographic Data." *PLoS Computational Biology* 13 (9):  
336 e1005697.
- 337 20. Rabaah, A., D. Doaa, and A. Asma. 2016. "Early Childhood Education in Saudi Arabia:  
338 Report." *World Journal of Education* 6 (5): 1–8.  
339 <https://files.eric.ed.gov/fulltext/EJ1158243.pdf>, accessed March 13, 2022.
- 340 21. World Bank. No date. World Bank Open Data. <https://data.worldbank.org/>. Accessed  
341 November 27, 2020.

- 342 22. Bisanzio D, Kraemer MU, Bogoch II, Brewer T, Brownstein JS, Reithinger R. 2020. Use of  
343 Twitter social media activity as a proxy for human mobility to predict the spatiotemporal  
344 spread of COVID-19 at global scale. *Geospatial health*.15;15(1).
- 345 23. Al-Tawfiq, J.A., Sattar, A., Al-Khadra, H., Al-Qahtani, S., Al-Mulhim, M., Al-Omoush, O.  
346 and Kheir, H.O., 2020. Incidence of COVID-19 among returning travelers in quarantine  
347 facilities: a longitudinal study and lessons learned. *Travel medicine and infectious disease*, 38,  
348 p.101901.
- 349 24. McAloon C, Collins Á, Hunt K, Barber A, Byrne AW, Butler F, Casey M, Griffin J, Lane E,  
350 McEvoy D, Wall P. 2020. Incubation period of COVID-19: a rapid systematic review and  
351 meta-analysis of observational research. *BMJ Open* 10:e039652.
- 352 25. Khan AA, AlRuthia Y, Balkhi B, Alghadeer SM, Temsah MH, Althunayyan SM, Alsofayan  
353 YM. 2020. Survival and estimation of direct medical costs of hospitalized COVID-19 patients  
354 in the Kingdom of Saudi Arabia. *Int. Journal of Environm. Res. and Public Health* 17:7458.
- 355 26. Barber A, Butler F, Griffin J, Lane EA, McAloon C, O'Brien K. 2020. Inferred duration of  
356 infectious period of SARS-CoV-2: rapid scoping review and analysis of available evidence for  
357 asymptomatic and symptomatic COVID-19 cases. *BMJ Open* 10:e039856.
- 358 27. Russell TW, Golding N, Hellewell J, Abbott S, Wright L, Pearson CA, van Zandvoort K,  
359 Jarvis CI, Gibbs H, Liu Y, Eggo RM. 2020. Reconstructing the early global dynamics of  
360 under-ascertained COVID-19 cases and infections. *BMC Medicine* 18:1-9.
- 361 28. WHO (World Health Organization). 2020a. "Coronavirus Disease (COVID-19): Similarities  
362 and Differences with Influenza." Updated September 30, 2021.  
363 [https://www.who.int/emergencies/diseases/novel-coronavirus-2019/question-and-answers-](https://www.who.int/emergencies/diseases/novel-coronavirus-2019/question-and-answers-hub/q-a-detail/coronavirus-disease-covid-19-similarities-and-differences-with-influenza)  
364 [hub/q-a-detail/coronavirus-disease-covid-19-similarities-and-differences-with-influenza,](https://www.who.int/emergencies/diseases/novel-coronavirus-2019/question-and-answers-hub/q-a-detail/coronavirus-disease-covid-19-similarities-and-differences-with-influenza)  
365 accessed March 13, 2022.
- 366 29. Allen, H., A. Vusirikala, J. Flannagan, K. A. Twohig, A. Zaidi, D. Chudasama, T. Lamagni,  
367 N. Groves, C. Turner, C. Rawlinson, J. Lopez-Bernal, R. Harris, A. Charlett, G. Dabrera, M.

- 368 Kall, and COVID-19 Genomics UK (COG-UK Consortium). 2022. “Household Transmission  
369 of COVID-19 Cases Associated with SARS-CoV-2 Delta Variant (B. 1.617. 2): National  
370 Case-Control Study.” *The Lancet Regional Health-Europe* 12: 100252.
- 371 30. Arab News. 2021. “Delta Variant Reported among Saudi Arabia’s New Virus Cases.” August  
372 15, 2021; updated December 20, 2021. *Arab News*  
373 <https://www.arabnews.com/node/1911526/saudi-arabia>, accessed March 13, 2022.
- 374 31. Hall, V., S. Foulkes, F. Insalata, P. Kirwan, A. Saei, A. Atti, E. Wellington, J. Khawam, K.  
375 Munro, M. Cole, and C. Tranquillini. 2022. “Protection against SARS-CoV-2 after Covid-19  
376 Vaccination and Previous Infection.” *New England Journal of Medicine* 386 (13): 1207–20.
- 377 32. Ritchie, H. E. Mathieu, L. Rodés-Guirao, C. Appel, C. Giattino, E. Ortiz-Ospina, J. Hasell, B.  
378 Macdonald, D. Beltekian, and M. Roser. 2020. "Coronavirus Pandemic (COVID-19)".  
379 Published online at OurWorldInData.org. <https://ourworldindata.org/coronavirus>, accessed  
380 March 14, 2022.
- 381 33. Reno, C., F. Sanmarchi, M. A. Stoto, M. P. Fantini, J. Lenzi, and D. Golinelli. 2022. “The  
382 Impact of Health Policies and Vaccine Rollout on the COVID-19 Pandemic Waves in Italy.”  
383 *Health Policy and Technology*, 100604.
- 384 34. Salathé, M., C. L. Althaus, N. Anderegg, D. Antonioli, T. Ballouz, E. Bugnion, S. Capkun, D.  
385 Jackson, S. I. Kim, J. R. Larus, and N. Low. 2020. “Early Evidence of Effectiveness of Digital  
386 Contact Tracing for SARS-CoV-2 in Switzerland.” *Swiss Medical Weekly* 150: w20457.
- 387 35. Wymant, C., L. Ferretti, D. Tsallis, M. Charalambides, L. Abeler-Dörner, D. Bonsall, R.  
388 Hinch, M/ Kendall, L. Milsom, M. Ayres, and C. Holmes. 2021. “The Epidemiological Impact  
389 of the NHS COVID-19 App.” *Nature* 594 (7863): 408–12.



- 390 36. Yuan, H. Y. and C. Blakemore. 2022. “The Impact of Contact Tracing and Testing on  
391 Controlling COVID-19 Outbreak without Lockdown in Hong Kong: An Observational  
392 Study.” *The Lancet Regional Health-Western Pacific* 20: 100374.
- 393 37. Vogt, F., B. Haire, L. Selvey, A. L. Katelaris, and J. Kaldor. 2022. “Effectiveness Evaluation  
394 of Digital Contact Tracing for COVID-19 in New South Wales, Australia.” *The Lancet Public  
395 Health* 7 (3): e250–8.
- 396 38. Mendez-Brito, A., C. El Bcheraoui, and F. Pozo-Martin. 2021. “Systematic Review of  
397 Empirical Studies Comparing the Effectiveness of Non-Pharmaceutical Interventions against  
398 COVID-19.” *Journal of Infection* 83 (3): 281–93.
- 399 39. Braithwaite, I., T. Callender, M. Bullock, and R. W. Aldridge. 2020. “Automated and Partly  
400 Automated Contact Tracing: A Systematic Review to Inform the Control of COVID-19.” *The  
401 Lancet Digital Health* 2 (11): e607–21.
- 402 40. Mills, M. C. and T. Rüttenauer. 2022. “The Effect of Mandatory COVID-19 Certificates on  
403 Vaccine Uptake: Synthetic-Control Modelling of Six Countries.” *The Lancet Public Health* 7  
404 (1): e15–22.
- 405 41. Brown, R. C., D. Kelly, D. Wilkinson, and J. Savulescu. 2021. “The Scientific and Ethical  
406 Feasibility of Immunity Passports.” *The Lancet Infectious Diseases* 21 (3): e58–63.
- 407 42. WHO (World Health Organization). 2021. “Update on Omicron.” *WHO News*, November 28,  
408 2021. <https://www.who.int/news/item/28-11-2021-update-on-omicron>, accessed March 13,  
409 2022.
- 410 43. Saudi Gazette. 2022. “Immunaztion Status to be Updated in February on Tawakkalna, 8  
411 months after the Second Dose.” *Saudi Gazette*, January 18, 2022.  
412 <https://saudigazette.com.sa/article/615997/SAUDI-ARABIA/Immunaztion-status-to-be->

413 [updated-in-February-on-Tawakkalna-8-months-after-the-second-dose](#), accessed March 13,  
414 2022.

415 44. AlBahrani S, AlAhmadi N, Hamdan S, Elsheikh N, Osman A, Almuthen S, Almajed  
416 GN, Alkhuraim AH, Jebakumar AZ, Al-Tawfiq JA. Clinical presentation and outcome  
417 of hospitalized patients with COVID-19 in the first and second waves in Saudi Arabia.  
418 International Journal of Infectious Diseases. 2022 May 1;118:104-8.

419

420

421

422

423

424

425

## 426 Tables and figures

427 **Table 1. The Impact of Using the Tawakkalna App as an Immunity Passport on Cases,**

428 **Hospitalizations, and Deaths, March 2021 to November 2021**

| <b>Epidemic metrics</b> | <b>Without the app<br/>(95% CI)</b> | <b>With the app (95%<br/>CI)</b> | <b>Difference</b>                 |
|-------------------------|-------------------------------------|----------------------------------|-----------------------------------|
| Total infected          | 1,515,468<br>(965,725–1,986,966)    | 172,369                          | + 1,343,099<br>(8.7 times higher) |
| Total hospitalized      | 121,237<br>(77,258–158,957)         | 8,915*                           | + 112,322<br>(13.5 times higher)  |
| Total deaths            | 30,309<br>(19,314–39,739)           | 2,342                            | + 27,967<br>(11.9 times higher)   |

429 *Source:* Original table for this publication.

430 *Note:* Numbers in parentheses refer to 95% CI.

431 <sup>a</sup>MOH Saudi Arabia COVID 19 Dashboard [12], <sup>b</sup>estimated using AlBahrani et al 2022 [48]

432

433 **Table 2. The Impact of Using the Tawakkalna App as an Immunity Passport on Cases,**  
434 **Hospitalizations, and Deaths, August 2021 to November 2021**

| <b>Epidemic metrics</b> | <b>Without the app<br/>(95% CI)</b> | <b>With the app (95%<br/>CI)</b> | <b>Difference</b>              |
|-------------------------|-------------------------------------|----------------------------------|--------------------------------|
| Total infected          | 38,847<br>(26,571–62,996)           | 23,426 <sup>a</sup>              | + 15,421<br>(1.7 times higher) |
| Total hospitalized      | 3,107<br>(2,125–5,039)              | 1,639 <sup>b</sup>               | +1,468<br>(1.8 times higher)   |
| Total deaths            | 776<br>(531–1,259)                  | 593 <sup>a</sup>                 | + 183<br>(1.3 times higher)    |

435 <sup>a</sup>MOH Saudi Arabia COVID 19 Dashboard [12], <sup>b</sup>estimated using AlBahrani et al 2022 [48]

436

437 **Figure 1. Epidemic Curves of the COVID-19 Epidemic in KSA with an Immune Passport (panel**  
438 **A) and Scenarios without an Immune Passport (panel B), March 1, 2020, to December 1, 2021.**

439 The yellow bars are the mean values of the simulation, and the green and red bars are the 95 percent  
440 confidence interval (95% CI). The orange bars and line represent the reported number of cases until  
441 December 1, 2021 [12]. CI = confidence interval.

442

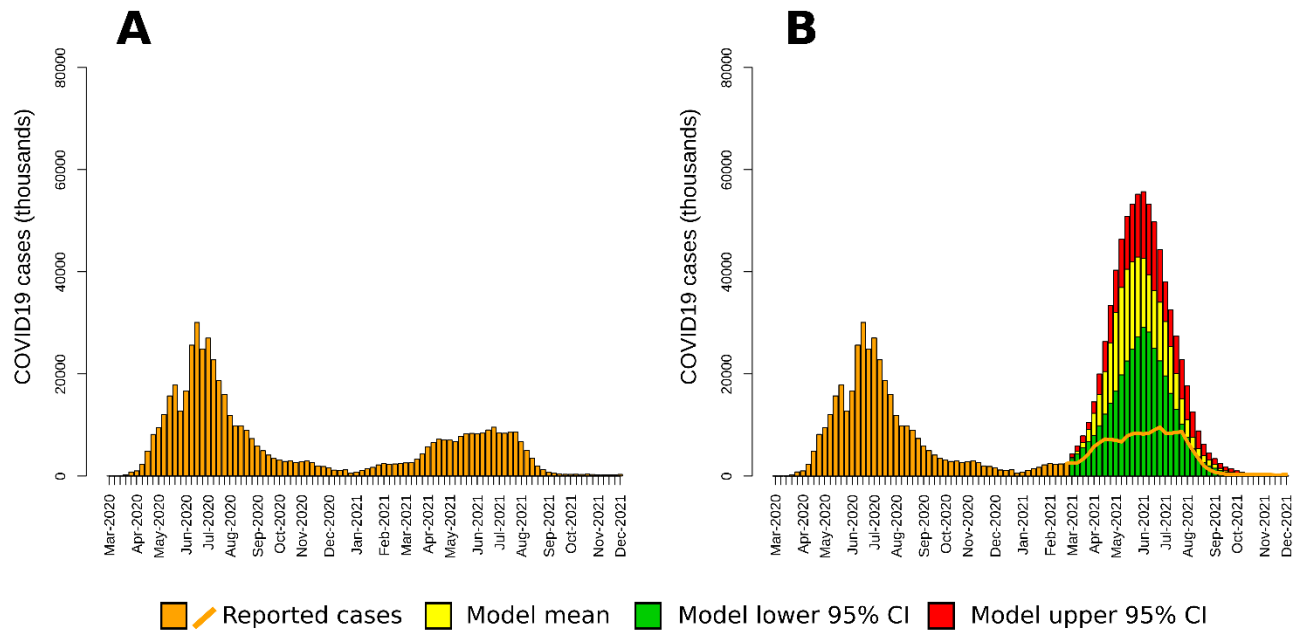

443

444

445

446

447

448

449

450

451

452
